# Supplementary material for: Novel method to select meaningful outcomes for evaluation in clinical trials
Source: HighWire-hosted journal article supplement (doi:10.1136/bmjresp-2021-000877), 2021-10-01
Supplement: bmjresp-2021-000877supp002_data_supplement.xlsx [file bmjresp-2021-000877supp002_data_supplement.xlsx]

## Sheet: Appendix 2_Prioritisation
PEx
	GROUP	OUTCOME	PLEASE CIRCLE (1=Not at all important, 2=Slightly important, 3=Moderately important, 4=Very important, 5=Extremely important)
Feels	General symptomatology	Sleep disturbance	1	2	3	4	5
		Fatigue/low energy	1	2	3	4	5
		Poor appetite	1	2	3	4	5
		Poor exercise tolerance	1	2	3	4	5
		Presence of pain	1	2	3	4	5
		Weakness/feeling deconditioned	1	2	3	4	5
		Presence of headaches	1	2	3	4	5
		Nausea/vomiting	1	2	3	4	5
		Fevers	1	2	3	4	5
		Reduced activity level (normal day-to-day activities)	1	2	3	4	5
		Presence of sweating (including night sweats)	1	2	3	4	5
		Feeling unwell	1	2	3	4	5
	Lung related symptoms	Coughing	1	2	3	4	5
		Wheeze	1	2	3	4	5
		Sputum production (presence of, or worsening from baseline)	1	2	3	4	5
		Inability to clear/cough up sputum	1	2	3	4	5
		Chest tightness	1	2	3	4	5
		Haemoptysis	1	2	3	4	5
		Shortness of breath/difficulty breathing	1	2	3	4	5
	Nutrition	Poor weight gain/weight loss	1	2	3	4	5
		Reduced BMI (body mass index)	1	2	3	4	5
		Reduced muscle mass	1	2	3	4	5
	Mental health	Anxiety/worry	1	2	3	4	5
		Stress	1	2	3	4	5
		Sadness/Mood	1	2	3	4	5
		Frustration	1	2	3	4	5
		Irritability	1	2	3	4	5
		Feeling useless	1	2	3	4	5
	Treatment related side-effects	Hearing impairment	1	2	3	4	5
		Renal (kidney) impairment	1	2	3	4	5
		C. difficile infection (bacterial infection)	1	2	3	4	5
		Diarrhoea	1	2	3	4	5
		Abdominal (tummy) pain	1	2	3	4	5
		Liver dysfunction	1	2	3	4	5
		Gastrointestinal disturbance	1	2	3	4	5
		New/worsening cough	1	2	3	4	5
		Appetite disturbance	1	2	3	4	5
		Fever	1	2	3	4	5
		Nasal congestion/blockage	1	2	3	4	5
		Poor growth	1	2	3	4	5
		Prolapse (rectal/vaginal)	1	2	3	4	5
		Analphylaxis/allergy	1	2	3	4	5
		Development of antimicrobial resistance	1	2	3	4	5
		New rash	1	2	3	4	5
		Hoarseness/throat discomfort	1	2	3	4	5
		Mood disturbance	1	2	3	4	5
		Visual (eye) impairment	1	2	3	4	5
		Photosensitivity (reactivity of the skin to light)	1	2	3	4	5
		Thrush (candida)	1	2	3	4	5
		Death resulting from treatment	1	2	3	4	5
		Nausea/vomiting	1	2	3	4	5
		Steroid related side-effects	1	2	3	4	5
Functions	Lung structure/function	Reduced/static lung function	1	2	3	4	5
		Pulmonary excerbations (more per year/time to next exacerbation shorter)	1	2	3	4	5
	Liver health		1	2	3	4	5
	Treatment burden	To what extent treatment of a pulmonary exacerbation impacts on you with respect to the hours involved in treatment, and on your ability to perform other desirable activities	1	2	3	4	5
	Quality of life	Reduced physcial well-being	1	2	3	4	5
		Reduced mental well-being	1	2	3	4	5
		Reduced social well-being	1	2	3	4	5
	Cost	Costly to individual	1	2	3	4	5
		Costly to society	1	2	3	4	5
	Hospitalisation		1	2	3	4	5
Survives	Death/life expectancy		1	2	3	4	5
	Infection-related	Acquiring resistant organisms	1	2	3	4	5
		Inability to eradicate organisms	1	2	3	4	5
		Acquisition of specific lung organisms	1	2	3	4	5
	Cure		1	2	3	4	5
