# Supplementary figures and images for: Novel method to select meaningful outcomes for evaluation in clinical trials
Source: HighWire-hosted journal article supplement (doi:10.1136/bmjresp-2021-000877), 2021-10-01

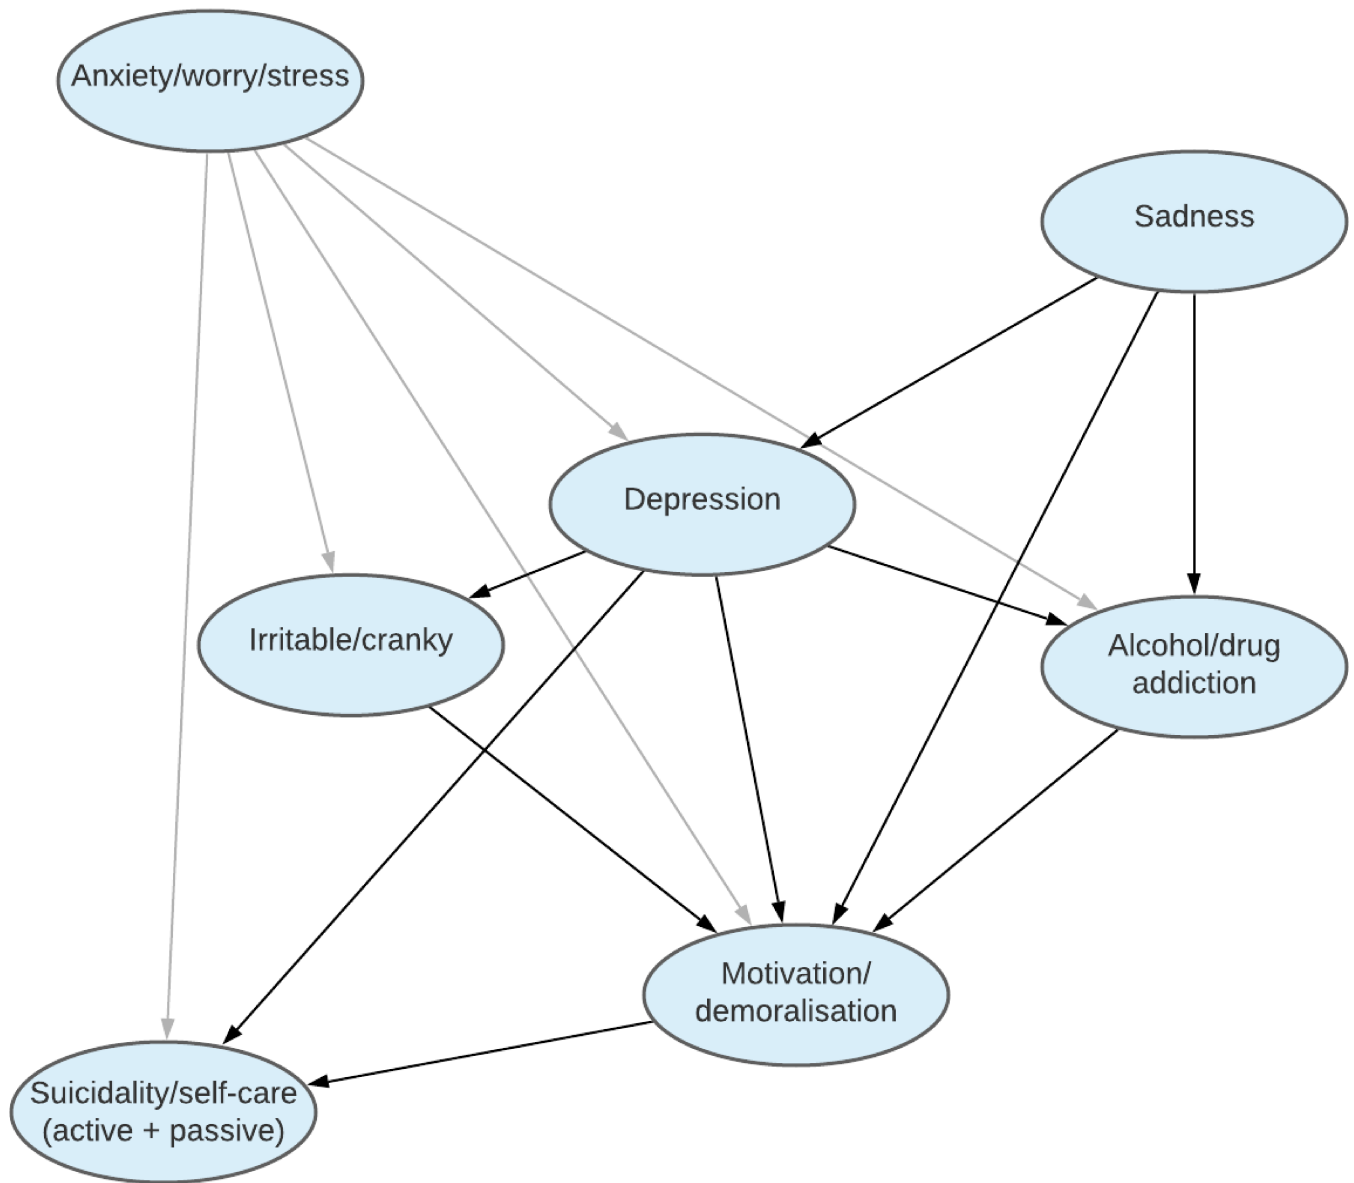

Supplement: bmjresp-2021-000877supp006_data_supplement.pdf [file bmjresp-2021-000877supp006_data_supplement.pdf]

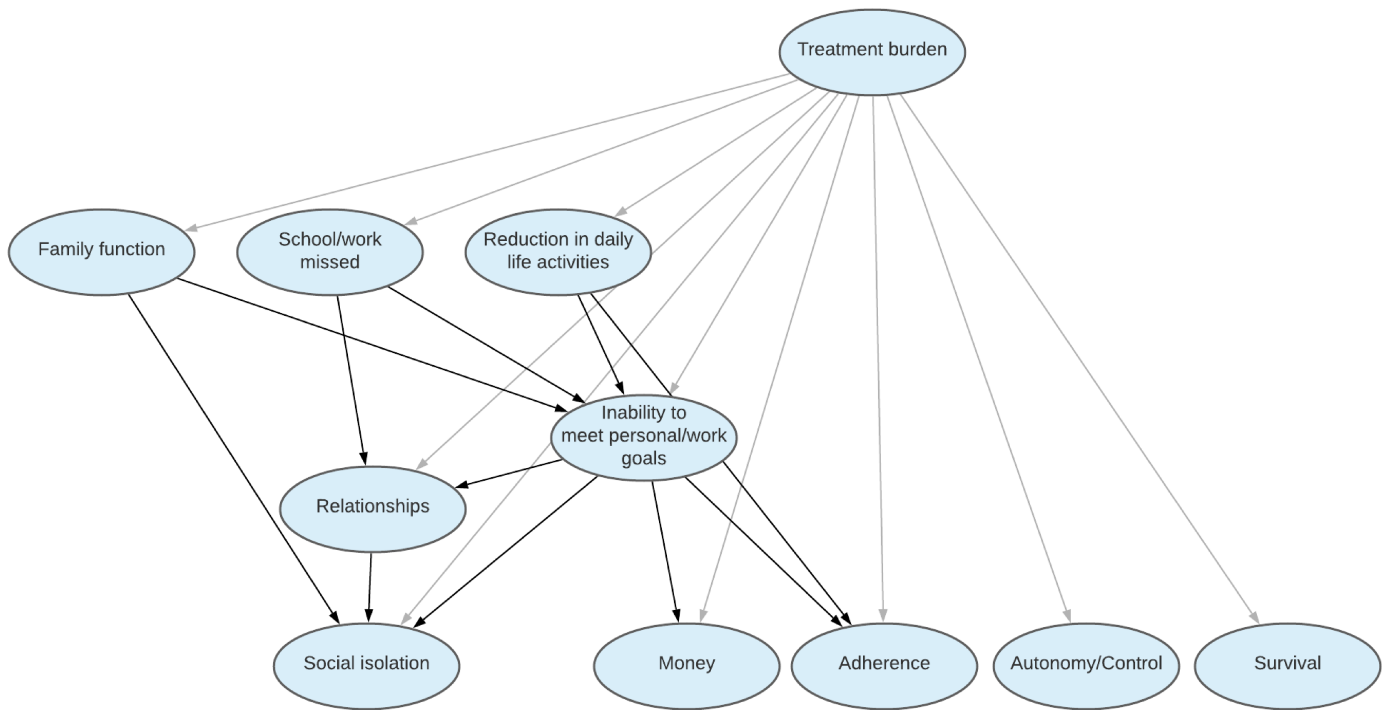

Supplement: bmjresp-2021-000877supp007_data_supplement.pdf [file bmjresp-2021-000877supp007_data_supplement.pdf]
